# Supplementary material
Source: PubMed Central journal article supplement (PMC7223949)
Supplement: 10096_2019_3720_MOESM1_ESM.pdf [file 10096_2019_3720_MOESM1_ESM.pdf]

# Ventilator associated pneumonia (VAP) diagnostic tests: a multi-criteria decision analysis to establish diagnosis priorities.

Instructions: Dear sir/madame, you are filling this form due your expertise in respiratory tract infections, namely infections VAP. This study focus on VAP diagnosis. You should rank, according each question instructions, your preferences.

You have to answer all the questions. You will need 20 minutes to fill the form.

This study is an activity of CIBERES (Centro de investigación en red de enfermedades respiratorias) and CRIPS (Clinical Research/epidemiology In Pneumonia & Sepsis). It is coordinated by Jordi Rello, MD, PhD.

If you find any problem or have any question, please contact [@gmail.com](mailto: @gmail.com).

Your information will be treated anonymously.

\* Required

**Email address \***

---

**Please type your initials (for duplicates control): \***

---

**How do you spend most of your work-time? \***

*Mark only one oval.*

- As clinical microbiologist
- As attending physician

**In your ICU, who does perform bronchoscopy for VAP diagnosis? \***

*Mark only one oval.*

- Pneumologist doing bronchoscopy most of the working-week
- Pneumologists with other daily activities
- Intensivists
- Pneumologists on weekdays and intensivists on weekends

**Question: From the following criteria, please rank the following characteristics from most (8) to the least (1) important for the diagnosis of VAP. \***

*Mark only one oval per row.*

|                                                | 1                     | 2                     | 3                     | 4                     | 5                     | 6                     | 7                     | 8                     |
|------------------------------------------------|-----------------------|-----------------------|-----------------------|-----------------------|-----------------------|-----------------------|-----------------------|-----------------------|
| Risk to the patient                            | <input type="radio"/> |
| Test availability                              | <input type="radio"/> |
| Time to clinical relevant result               | <input type="radio"/> |
| Impact on decision to start antibiotic therapy | <input type="radio"/> |
| Effect on antibiotic choice                    | <input type="radio"/> |
| Cost                                           | <input type="radio"/> |
| Need for professionals experience              | <input type="radio"/> |
| Impact in patient outcomes                     | <input type="radio"/> |

**1.A. Choose between the next IMAGING TECHNIQUES which one is more relevant for you regarding VAP diagnosis (1 least important, 4 most important): Note if none is your best answer, rank "none" with 4. \***

*Mark only one oval per row.*

|                 | 1                     | 2                     | 3                     | 4                     |
|-----------------|-----------------------|-----------------------|-----------------------|-----------------------|
| Chest X-ray     | <input type="radio"/> | <input type="radio"/> | <input type="radio"/> | <input type="radio"/> |
| Chest CT        | <input type="radio"/> | <input type="radio"/> | <input type="radio"/> | <input type="radio"/> |
| Lung ultrasound | <input type="radio"/> | <input type="radio"/> | <input type="radio"/> | <input type="radio"/> |
| None            | <input type="radio"/> | <input type="radio"/> | <input type="radio"/> | <input type="radio"/> |

**1.B. In your ICU, when a VAP is suspected in which percentage of patients you use the next IMAGING TECHNIQUES?**

*Check all that apply.*

|       | Chest X-ray              | Chest CT                 | Lung ultrasound          | None                     |
|-------|--------------------------|--------------------------|--------------------------|--------------------------|
| 0     | <input type="checkbox"/> | <input type="checkbox"/> | <input type="checkbox"/> | <input type="checkbox"/> |
| 10 %  | <input type="checkbox"/> | <input type="checkbox"/> | <input type="checkbox"/> | <input type="checkbox"/> |
| 20 %  | <input type="checkbox"/> | <input type="checkbox"/> | <input type="checkbox"/> | <input type="checkbox"/> |
| 30 %  | <input type="checkbox"/> | <input type="checkbox"/> | <input type="checkbox"/> | <input type="checkbox"/> |
| 40 %  | <input type="checkbox"/> | <input type="checkbox"/> | <input type="checkbox"/> | <input type="checkbox"/> |
| 50 %  | <input type="checkbox"/> | <input type="checkbox"/> | <input type="checkbox"/> | <input type="checkbox"/> |
| 60 %  | <input type="checkbox"/> | <input type="checkbox"/> | <input type="checkbox"/> | <input type="checkbox"/> |
| 70 %  | <input type="checkbox"/> | <input type="checkbox"/> | <input type="checkbox"/> | <input type="checkbox"/> |
| 80 %  | <input type="checkbox"/> | <input type="checkbox"/> | <input type="checkbox"/> | <input type="checkbox"/> |
| 90 %  | <input type="checkbox"/> | <input type="checkbox"/> | <input type="checkbox"/> | <input type="checkbox"/> |
| 100 % | <input type="checkbox"/> | <input type="checkbox"/> | <input type="checkbox"/> | <input type="checkbox"/> |

**2. In VAP patients, regarding the RISK TO THE PATIENT of the following imaging techniques please rank (1 higher risk. 4 lower risk): \***

*Mark only one oval per row.*

|                 | 1                     | 2                     | 3                     | 4                     |
|-----------------|-----------------------|-----------------------|-----------------------|-----------------------|
| Chest X- ray    | <input type="radio"/> | <input type="radio"/> | <input type="radio"/> | <input type="radio"/> |
| Chest CT        | <input type="radio"/> | <input type="radio"/> | <input type="radio"/> | <input type="radio"/> |
| Lung ultrasound | <input type="radio"/> | <input type="radio"/> | <input type="radio"/> | <input type="radio"/> |
| None            | <input type="radio"/> | <input type="radio"/> | <input type="radio"/> | <input type="radio"/> |

**3. In VAP patients, please rank the following imaging techniques concerning TEST AVAILABILITY (1 least available, 4 most available): \***

*Mark only one oval per row.*

|                 | 1                     | 2                     | 3                     | 4                     |
|-----------------|-----------------------|-----------------------|-----------------------|-----------------------|
| Chest X- ray    | <input type="radio"/> | <input type="radio"/> | <input type="radio"/> | <input type="radio"/> |
| Chest CT        | <input type="radio"/> | <input type="radio"/> | <input type="radio"/> | <input type="radio"/> |
| Lung ultrasound | <input type="radio"/> | <input type="radio"/> | <input type="radio"/> | <input type="radio"/> |
| None            | <input type="radio"/> | <input type="radio"/> | <input type="radio"/> | <input type="radio"/> |

**4. In VAP patients, please rank the following imaging techniques according to their NEED OF PROFESSIONALS EXPERIENCE (1 most experienced, 4 least experienced): \***

*Mark only one oval per row.*

|                 | 1                     | 2                     | 3                     | 4                     |
|-----------------|-----------------------|-----------------------|-----------------------|-----------------------|
| Chest X- ray    | <input type="radio"/> | <input type="radio"/> | <input type="radio"/> | <input type="radio"/> |
| Chest CT        | <input type="radio"/> | <input type="radio"/> | <input type="radio"/> | <input type="radio"/> |
| Lung ultrasound | <input type="radio"/> | <input type="radio"/> | <input type="radio"/> | <input type="radio"/> |
| None            | <input type="radio"/> | <input type="radio"/> | <input type="radio"/> | <input type="radio"/> |

**5. In VAP patients, please rank the following imaging techniques according to their IMPACT ON DECISION TO START ANTIBIOTIC (1 least impact, 4 most impact): \***

*Mark only one oval per row.*

|                 | 1                     | 2                     | 3                     | 4                     |
|-----------------|-----------------------|-----------------------|-----------------------|-----------------------|
| Chest X- ray    | <input type="radio"/> | <input type="radio"/> | <input type="radio"/> | <input type="radio"/> |
| Chest CT        | <input type="radio"/> | <input type="radio"/> | <input type="radio"/> | <input type="radio"/> |
| Lung ultrasound | <input type="radio"/> | <input type="radio"/> | <input type="radio"/> | <input type="radio"/> |
| None            | <input type="radio"/> | <input type="radio"/> | <input type="radio"/> | <input type="radio"/> |

**6. In VAP patients, please rank the following imaging techniques according to their POTENTIAL IMPACT ON PATIENTS OUTCOMES (1 least impact, 4 most impact): \***

*Mark only one oval per row.*

|                 | 1                     | 2                     | 3                     | 4                     |
|-----------------|-----------------------|-----------------------|-----------------------|-----------------------|
| Chest X- ray    | <input type="radio"/> | <input type="radio"/> | <input type="radio"/> | <input type="radio"/> |
| Chest CT        | <input type="radio"/> | <input type="radio"/> | <input type="radio"/> | <input type="radio"/> |
| Lung ultrasound | <input type="radio"/> | <input type="radio"/> | <input type="radio"/> | <input type="radio"/> |
| None            | <input type="radio"/> | <input type="radio"/> | <input type="radio"/> | <input type="radio"/> |

**7. In VAP patients, please rank the following imaging techniques according to their COST (1 most expensive, 4 cheapest): \***

*Mark only one oval per row.*

|                 | 1                     | 2                     | 3                     | 4                     |
|-----------------|-----------------------|-----------------------|-----------------------|-----------------------|
| Chest X- ray    | <input type="radio"/> | <input type="radio"/> | <input type="radio"/> | <input type="radio"/> |
| Chest CT        | <input type="radio"/> | <input type="radio"/> | <input type="radio"/> | <input type="radio"/> |
| Lung ultrasound | <input type="radio"/> | <input type="radio"/> | <input type="radio"/> | <input type="radio"/> |
| None            | <input type="radio"/> | <input type="radio"/> | <input type="radio"/> | <input type="radio"/> |

**8.A. Choose between the next MICROBIOLOGICAL TESTS which one is more relevant for you regarding VAP diagnosis (1 least important, 6 most important): Note if none is your best answer, rank "none" with 6. \***

*Mark only one oval per row.*

|                                                  | 1                     | 2                     | 3                     | 4                     | 5                     | 6                     |
|--------------------------------------------------|-----------------------|-----------------------|-----------------------|-----------------------|-----------------------|-----------------------|
| Blood Cultures                                   | <input type="radio"/> |
| Endotracheal aspirate culture                    | <input type="radio"/> |
| Mini-bronchoalveolar lavage culture (Combicath®) | <input type="radio"/> |
| Bronchoalveolar lavage culture                   | <input type="radio"/> |
| Telescopic catheter                              | <input type="radio"/> |
| Transbronchial biopsy                            | <input type="radio"/> |

**8.B. In your ICU, when a VAP is suspected in which percentage of patients you use the next MICROBIOLOGICAL TESTS ?**

*Check all that apply.*

|       | Blood Cultures           | Endotracheal aspirate culture | Mini-bronchoalveolar lavage culture (Combicath®) | Bronchoalveolar lavage culture | Telescopic catheter      | Transbronchial biopsy    |
|-------|--------------------------|-------------------------------|--------------------------------------------------|--------------------------------|--------------------------|--------------------------|
| 0     | <input type="checkbox"/> | <input type="checkbox"/>      | <input type="checkbox"/>                         | <input type="checkbox"/>       | <input type="checkbox"/> | <input type="checkbox"/> |
| 10 %  | <input type="checkbox"/> | <input type="checkbox"/>      | <input type="checkbox"/>                         | <input type="checkbox"/>       | <input type="checkbox"/> | <input type="checkbox"/> |
| 20 %  | <input type="checkbox"/> | <input type="checkbox"/>      | <input type="checkbox"/>                         | <input type="checkbox"/>       | <input type="checkbox"/> | <input type="checkbox"/> |
| 30 %  | <input type="checkbox"/> | <input type="checkbox"/>      | <input type="checkbox"/>                         | <input type="checkbox"/>       | <input type="checkbox"/> | <input type="checkbox"/> |
| 40 %  | <input type="checkbox"/> | <input type="checkbox"/>      | <input type="checkbox"/>                         | <input type="checkbox"/>       | <input type="checkbox"/> | <input type="checkbox"/> |
| 50 %  | <input type="checkbox"/> | <input type="checkbox"/>      | <input type="checkbox"/>                         | <input type="checkbox"/>       | <input type="checkbox"/> | <input type="checkbox"/> |
| 60 %  | <input type="checkbox"/> | <input type="checkbox"/>      | <input type="checkbox"/>                         | <input type="checkbox"/>       | <input type="checkbox"/> | <input type="checkbox"/> |
| 70 %  | <input type="checkbox"/> | <input type="checkbox"/>      | <input type="checkbox"/>                         | <input type="checkbox"/>       | <input type="checkbox"/> | <input type="checkbox"/> |
| 80 %  | <input type="checkbox"/> | <input type="checkbox"/>      | <input type="checkbox"/>                         | <input type="checkbox"/>       | <input type="checkbox"/> | <input type="checkbox"/> |
| 90 %  | <input type="checkbox"/> | <input type="checkbox"/>      | <input type="checkbox"/>                         | <input type="checkbox"/>       | <input type="checkbox"/> | <input type="checkbox"/> |
| 100 % | <input type="checkbox"/> | <input type="checkbox"/>      | <input type="checkbox"/>                         | <input type="checkbox"/>       | <input type="checkbox"/> | <input type="checkbox"/> |

**9. Between the next microbiological tests rank which one has more RISK FOR PATIENTS in VAP diagnosis (1 higher risk. 6 lower risk): \***

*Mark only one oval per row.*

|                                                  | 1                     | 2                     | 3                     | 4                     | 5                     | 6                     |
|--------------------------------------------------|-----------------------|-----------------------|-----------------------|-----------------------|-----------------------|-----------------------|
| Blood Cultures                                   | <input type="radio"/> |
| Endotracheal aspirate culture                    | <input type="radio"/> |
| Mini-bronchoalveolar lavage culture (Combicath®) | <input type="radio"/> |
| Bronchoalveolar lavage culture                   | <input type="radio"/> |
| Telescopic catheter                              | <input type="radio"/> |
| Transbronchial biopsy                            | <input type="radio"/> |

**10. Which one of the following microbiological tests rank is more AVAILABLE in VAP diagnosis in your ICU (1 least available, 6 most available): \***

*Mark only one oval per row.*

|                                                  | 1                     | 2                     | 3                     | 4                     | 5                     | 6                     |
|--------------------------------------------------|-----------------------|-----------------------|-----------------------|-----------------------|-----------------------|-----------------------|
| Blood Cultures                                   | <input type="radio"/> |
| Endotracheal aspirate culture                    | <input type="radio"/> |
| Mini-bronchoalveolar lavage culture (Combicath®) | <input type="radio"/> |
| Bronchoalveolar lavage culture                   | <input type="radio"/> |
| Telescopic catheter                              | <input type="radio"/> |
| Transbronchial biopsy                            | <input type="radio"/> |

**11. Regarding the following microbiological tests rank which one has more IMPACT ON DECISION TO START ANTIBIOTIC THERAPY in VAP (1 least impact, 6 most impact): \***

*Mark only one oval per row.*

|                                                  | 1                     | 2                     | 3                     | 4                     | 5                     | 6                     |
|--------------------------------------------------|-----------------------|-----------------------|-----------------------|-----------------------|-----------------------|-----------------------|
| Blood Cultures                                   | <input type="radio"/> |
| Endotracheal aspirate culture                    | <input type="radio"/> |
| Mini-bronchoalveolar lavage culture (Combicath®) | <input type="radio"/> |
| Bronchoalveolar lavage culture                   | <input type="radio"/> |
| Telescopic catheter                              | <input type="radio"/> |
| Transbronchial biopsy                            | <input type="radio"/> |

**12. In VAP patients, please rank the following microbiological tests according to their POTENTIAL IMPACT ON PATIENTS OUTCOMES (1 least impact, 6 most impact) \***

*Mark only one oval per row.*

|                                                  | 1                     | 2                     | 3                     | 4                     | 5                     | 6                     |
|--------------------------------------------------|-----------------------|-----------------------|-----------------------|-----------------------|-----------------------|-----------------------|
| Blood Cultures                                   | <input type="radio"/> |
| Endotracheal aspirate culture                    | <input type="radio"/> |
| Mini-bronchoalveolar lavage culture (Combicath®) | <input type="radio"/> |
| Bronchoalveolar lavage culture                   | <input type="radio"/> |
| Telescopic catheter                              | <input type="radio"/> |
| Transbronchial biopsy                            | <input type="radio"/> |

**13. In VAP patients, please rank the following microbiological tests according to their NEED OF PROFESSIONALS EXPERIENCE (1 most experienced, 8 least experienced): \***

*Mark only one oval per row.*

|                                                  | 1                     | 2                     | 3                     | 4                     | 5                     | 6                     |
|--------------------------------------------------|-----------------------|-----------------------|-----------------------|-----------------------|-----------------------|-----------------------|
| Blood Cultures                                   | <input type="radio"/> |
| Endotracheal aspirate culture                    | <input type="radio"/> |
| Mini-bronchoalveolar lavage culture (Combicath®) | <input type="radio"/> |
| Bronchoalveolar lavage culture                   | <input type="radio"/> |
| Telescopic catheter                              | <input type="radio"/> |
| Transbronchial biopsy                            | <input type="radio"/> |

**14. In VAP patients, please rank the following microbiological tests according to their COST (1 most expensive, 6 cheapest) \***

Mark only one oval per row.

|                                                  | 1                     | 2                     | 3                     | 4                     | 5                     | 6                     |
|--------------------------------------------------|-----------------------|-----------------------|-----------------------|-----------------------|-----------------------|-----------------------|
| Blood Cultures                                   | <input type="radio"/> |
| Endotracheal aspirate culture                    | <input type="radio"/> |
| Mini-bronchoalveolar lavage culture (Combicath®) | <input type="radio"/> |
| Bronchoalveolar lavage culture                   | <input type="radio"/> |
| Telescopic catheter                              | <input type="radio"/> |
| Transbronchial biopsy                            | <input type="radio"/> |

**15.A. Regarding the following BIOMARKERS which one is more relevant for you in VAP diagnosis (1 least important, 7 most important). Note: if none is your preferred answer, rank "none" with 7. \***

Mark only one oval per row.

|                        | 1                     | 2                     | 3                     | 4                     | 5                     | 6                     | 7                     |
|------------------------|-----------------------|-----------------------|-----------------------|-----------------------|-----------------------|-----------------------|-----------------------|
| None                   | <input type="radio"/> |
| White blood cell count | <input type="radio"/> |
| Interleukin 6          | <input type="radio"/> |
| Interleukin 10         | <input type="radio"/> |
| Pro-adrenomedullin     | <input type="radio"/> |
| C-reactive protein     | <input type="radio"/> |
| Procalcitonin          | <input type="radio"/> |

**15.B. In your ICU, when a VAP is suspected in which percentage of patients you use the next BIOMARKERS?**

Check all that apply.

|       | None                     | White blood cell count   | Interleukin 6            | Interleukin 10           | Pro-adrenomedullin       | C-reactive protein       | Procalcitonin            |
|-------|--------------------------|--------------------------|--------------------------|--------------------------|--------------------------|--------------------------|--------------------------|
| 0     | <input type="checkbox"/> |
| 10 %  | <input type="checkbox"/> |
| 20 %  | <input type="checkbox"/> |
| 30 %  | <input type="checkbox"/> |
| 40 %  | <input type="checkbox"/> |
| 50 %  | <input type="checkbox"/> |
| 60 %  | <input type="checkbox"/> |
| 70 %  | <input type="checkbox"/> |
| 80 %  | <input type="checkbox"/> |
| 90 %  | <input type="checkbox"/> |
| 100 % | <input type="checkbox"/> |

**16. In VAP patients, please rank the following biomarkers concerning TEST AVAILABILITY in your ICU (1 least available, 7 most available): \***

*Mark only one oval per row.*

|                        | 1                     | 2                     | 3                     | 4                     | 5                     | 6                     | 7                     |
|------------------------|-----------------------|-----------------------|-----------------------|-----------------------|-----------------------|-----------------------|-----------------------|
| White blood cell count | <input type="radio"/> |
| Interleukin 6          | <input type="radio"/> |
| Interleukin 10         | <input type="radio"/> |
| Pro-adrenomedullin     | <input type="radio"/> |
| C-reactive protein     | <input type="radio"/> |
| Procalcitonin          | <input type="radio"/> |
| None                   | <input type="radio"/> |

**17. In VAP patients, please rank the following biomarkers according to their IMPACT ON DECISION TO START ANTIBIOTIC AND ITS CHOICE (1 least impact, 7 most impact): \***

*Mark only one oval per row.*

|                        | 1                     | 2                     | 3                     | 4                     | 5                     | 6                     | 7                     |
|------------------------|-----------------------|-----------------------|-----------------------|-----------------------|-----------------------|-----------------------|-----------------------|
| White blood cell count | <input type="radio"/> |
| Interleukin 6          | <input type="radio"/> |
| Interleukin 10         | <input type="radio"/> |
| Pro-adrenomedullin     | <input type="radio"/> |
| C-reactive protein     | <input type="radio"/> |
| Procalcitonin          | <input type="radio"/> |
| None                   | <input type="radio"/> |

**18. In VAP patients, please rank the following biomarkers according to their COST (1 most expensive, 7 cheapest): \***

*Mark only one oval per row.*

|                        | 1                     | 2                     | 3                     | 4                     | 5                     | 6                     | 7                     |
|------------------------|-----------------------|-----------------------|-----------------------|-----------------------|-----------------------|-----------------------|-----------------------|
| White blood cell count | <input type="radio"/> |
| Interleukin 6          | <input type="radio"/> |
| Interleukin 10         | <input type="radio"/> |
| Pro-adrenomedullin     | <input type="radio"/> |
| C-reactive protein     | <input type="radio"/> |
| Procalcitonin          | <input type="radio"/> |
| None                   | <input type="radio"/> |

**19. In VAP patients, please rank the following biomarkers according to their POTENTIAL IMPACT ON PATIENTS OUTCOMES (1 least impact, 6 most impact) \***

*Mark only one oval per row.*

|                        | 1                     | 2                     | 3                     | 4                     | 5                     | 6                     | 7                     |
|------------------------|-----------------------|-----------------------|-----------------------|-----------------------|-----------------------|-----------------------|-----------------------|
| White blood cell count | <input type="radio"/> |
| Interleukin 6          | <input type="radio"/> |
| Interleukin 10         | <input type="radio"/> |
| Pro-adrenomedullin     | <input type="radio"/> |
| C-reactive protein     | <input type="radio"/> |
| Procalcitonin          | <input type="radio"/> |
| None                   | <input type="radio"/> |

**20.A. Regarding the following DIAGNOSTIC TECHNIQUES which one is more relevant for you in VAP diagnosis (1 least important, 8 most important). Note: if none is your preferred answer, rank "none" with 8. \***

*Mark only one oval per row.*

|                                         | 1                     | 2                     | 3                     | 4                     | 5                     | 6                     | 7                     | 8                     |
|-----------------------------------------|-----------------------|-----------------------|-----------------------|-----------------------|-----------------------|-----------------------|-----------------------|-----------------------|
| None                                    | <input type="radio"/> |
| Rapid automated microscopy              | <input type="radio"/> |
| Serological tests                       | <input type="radio"/> |
| MALDI-TOF                               | <input type="radio"/> |
| Respiratory specimens filmarray         | <input type="radio"/> |
| Serum and respiratory samples PCR tests | <input type="radio"/> |
| Gene Expert (R)                         | <input type="radio"/> |
| Gram stain                              | <input type="radio"/> |

**20.B. In your ICU, when a VAP is suspected in which percentage of patients you use the next DIAGNOSTIC TECHNIQUES?**

*Check all that apply.*

|       | None                     | Rapid automated microscopy | Serological tests        | MALDI-TOF                | Filmarray                | PCR tests                | Gene Expert (R) for ESBL | Gram stain               |
|-------|--------------------------|----------------------------|--------------------------|--------------------------|--------------------------|--------------------------|--------------------------|--------------------------|
| 0     | <input type="checkbox"/> | <input type="checkbox"/>   | <input type="checkbox"/> | <input type="checkbox"/> | <input type="checkbox"/> | <input type="checkbox"/> | <input type="checkbox"/> | <input type="checkbox"/> |
| 10 %  | <input type="checkbox"/> | <input type="checkbox"/>   | <input type="checkbox"/> | <input type="checkbox"/> | <input type="checkbox"/> | <input type="checkbox"/> | <input type="checkbox"/> | <input type="checkbox"/> |
| 20 %  | <input type="checkbox"/> | <input type="checkbox"/>   | <input type="checkbox"/> | <input type="checkbox"/> | <input type="checkbox"/> | <input type="checkbox"/> | <input type="checkbox"/> | <input type="checkbox"/> |
| 30 %  | <input type="checkbox"/> | <input type="checkbox"/>   | <input type="checkbox"/> | <input type="checkbox"/> | <input type="checkbox"/> | <input type="checkbox"/> | <input type="checkbox"/> | <input type="checkbox"/> |
| 40 %  | <input type="checkbox"/> | <input type="checkbox"/>   | <input type="checkbox"/> | <input type="checkbox"/> | <input type="checkbox"/> | <input type="checkbox"/> | <input type="checkbox"/> | <input type="checkbox"/> |
| 50 %  | <input type="checkbox"/> | <input type="checkbox"/>   | <input type="checkbox"/> | <input type="checkbox"/> | <input type="checkbox"/> | <input type="checkbox"/> | <input type="checkbox"/> | <input type="checkbox"/> |
| 60 %  | <input type="checkbox"/> | <input type="checkbox"/>   | <input type="checkbox"/> | <input type="checkbox"/> | <input type="checkbox"/> | <input type="checkbox"/> | <input type="checkbox"/> | <input type="checkbox"/> |
| 70 %  | <input type="checkbox"/> | <input type="checkbox"/>   | <input type="checkbox"/> | <input type="checkbox"/> | <input type="checkbox"/> | <input type="checkbox"/> | <input type="checkbox"/> | <input type="checkbox"/> |
| 80 %  | <input type="checkbox"/> | <input type="checkbox"/>   | <input type="checkbox"/> | <input type="checkbox"/> | <input type="checkbox"/> | <input type="checkbox"/> | <input type="checkbox"/> | <input type="checkbox"/> |
| 90 %  | <input type="checkbox"/> | <input type="checkbox"/>   | <input type="checkbox"/> | <input type="checkbox"/> | <input type="checkbox"/> | <input type="checkbox"/> | <input type="checkbox"/> | <input type="checkbox"/> |
| 100 % | <input type="checkbox"/> | <input type="checkbox"/>   | <input type="checkbox"/> | <input type="checkbox"/> | <input type="checkbox"/> | <input type="checkbox"/> | <input type="checkbox"/> | <input type="checkbox"/> |

**21. In VAP patients, please rank the following diagnostic techniques concerning TEST AVAILABILITY (1 least available, 8 most available): \***

*Mark only one oval per row.*

|                            | 1                     | 2                     | 3                     | 4                     | 5                     | 6                     | 7                     | 8                     |
|----------------------------|-----------------------|-----------------------|-----------------------|-----------------------|-----------------------|-----------------------|-----------------------|-----------------------|
| None                       | <input type="radio"/> |
| Rapid automated microscopy | <input type="radio"/> |
| Serological tests          | <input type="radio"/> |
| MALDI-TOF                  | <input type="radio"/> |
| Filmarray                  | <input type="radio"/> |
| PCR tests                  | <input type="radio"/> |
| Gene Expert (R) for ESBL   | <input type="radio"/> |
| Gram stain                 | <input type="radio"/> |



**22. In VAP patients, please rank the following diagnostic techniques concerning TIME TO CLINICAL RELEVANT RESULT (1 least available, 8 most available): \***

*Mark only one oval per row.*

|                            | 1                     | 2                     | 3                     | 4                     | 5                     | 6                     | 7                     | 8                     |
|----------------------------|-----------------------|-----------------------|-----------------------|-----------------------|-----------------------|-----------------------|-----------------------|-----------------------|
| None                       | <input type="radio"/> |
| Rapid automated microscopy | <input type="radio"/> |
| Serological tests          | <input type="radio"/> |
| MALDI-TOF                  | <input type="radio"/> |
| Filmarray                  | <input type="radio"/> |
| PCR tests                  | <input type="radio"/> |
| Gene Expert (R) for ESBL   | <input type="radio"/> |
| Gram stain                 | <input type="radio"/> |

**23. In VAP patients, please rank the following diagnostic techniques according to their POTENTIAL IMPACT ON PATIENTS OUTCOMES (1 least impact, 8 most impact): \***

*Mark only one oval per row.*

|                            | 1                     | 2                     | 3                     | 4                     | 5                     | 6                     | 7                     | 8                     |
|----------------------------|-----------------------|-----------------------|-----------------------|-----------------------|-----------------------|-----------------------|-----------------------|-----------------------|
| None                       | <input type="radio"/> |
| Rapid automated microscopy | <input type="radio"/> |
| Serological tests          | <input type="radio"/> |
| MALDI-TOF                  | <input type="radio"/> |
| Filmarray                  | <input type="radio"/> |
| PCR tests                  | <input type="radio"/> |
| Gene Expert (R) for ESBL   | <input type="radio"/> |
| Gram stain                 | <input type="radio"/> |

**24. In VAP patients, please rank the following diagnostic techniques according to their COST (1 most expensive, 8 least expensive) \***

*Mark only one oval per row.*

|                            | 1                     | 2                     | 3                     | 4                     | 5                     | 6                     | 7                     | 8                     |
|----------------------------|-----------------------|-----------------------|-----------------------|-----------------------|-----------------------|-----------------------|-----------------------|-----------------------|
| None                       | <input type="radio"/> |
| Rapid automated microscopy | <input type="radio"/> |
| Serological tests          | <input type="radio"/> |
| MALDI-TOF                  | <input type="radio"/> |
| Filmarray                  | <input type="radio"/> |
| PCR tests                  | <input type="radio"/> |
| Gene Expert (R) for ESBL   | <input type="radio"/> |
| Gram stain                 | <input type="radio"/> |

**25. In VAP patients, please rank the following diagnostic techniques according to their NEED OF PROFESSIONALS EXPERIENCE (1 most experienced, 8 least experienced): \***

*Mark only one oval per row.*

|                            | 1                     | 2                     | 3                     | 4                     | 5                     | 6                     | 7                     | 8                     |
|----------------------------|-----------------------|-----------------------|-----------------------|-----------------------|-----------------------|-----------------------|-----------------------|-----------------------|
| None                       | <input type="radio"/> |
| Rapid automated microscopy | <input type="radio"/> |
| Serological tests          | <input type="radio"/> |
| MALDI-TOF                  | <input type="radio"/> |
| Filmarray                  | <input type="radio"/> |
| PCR tests                  | <input type="radio"/> |
| Gene Expert (R) for ESBL   | <input type="radio"/> |
| Gram stain                 | <input type="radio"/> |
